# Supplementary material
Source: PubMed Central journal article supplement (PMC7309520)
Supplement: NIHMS1594092-supplement-Supplementary_Figures.pdf [file NIHMS1594092-supplement-Supplementary_Figures.pdf]

In the format provided by the authors and unedited.

# Cryo-EM structure and dynamics of eukaryotic DNA polymerase $\delta$ holoenzyme

Rinku Jain <sup>1\*</sup>, William J. Rice<sup>2</sup>, Radhika Malik<sup>1</sup>, Robert E. Johnson<sup>3</sup>, Louise Prakash<sup>3</sup>, Satya Prakash<sup>3</sup>, Iban Ubarretxena-Belandia<sup>1,4,5</sup> and Aneel K. Aggarwal <sup>1\*</sup>

---

<sup>1</sup>Department of Pharmacological Sciences, Icahn School of Medicine at Mount Sinai, New York, NY, USA. <sup>2</sup>Simons Electron Microscopy Center, New York Structural Biology Center, New York, NY, USA. <sup>3</sup>Department of Biochemistry and Molecular Biology, University of Texas Medical Branch, Galveston, TX, USA. <sup>4</sup>Instituto Biofisika (UPV/EHU, CSIC), University of the Basque Country, Leioa, Spain. <sup>5</sup>Ikerbasque, Basque Foundation for Science, Bilbao, Spain.  
\*e-mail: [rinku.jain@mssm.edu](mailto:rinku.jain@mssm.edu); [aneel.aggarwal@mssm.edu](mailto:aneel.aggarwal@mssm.edu)

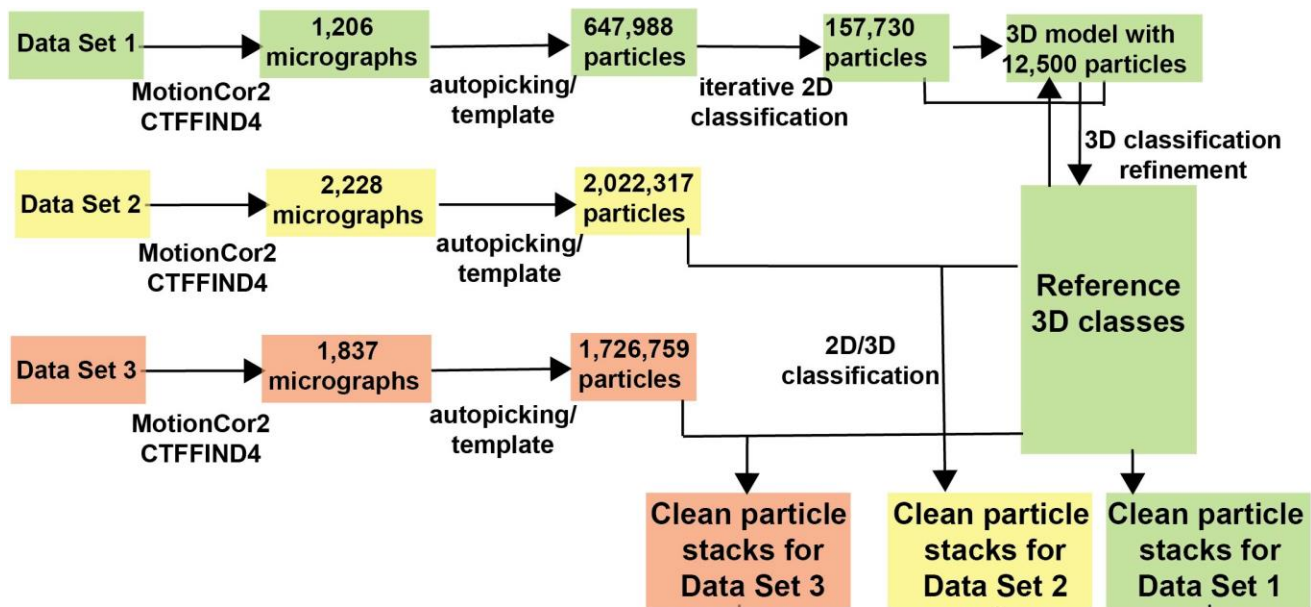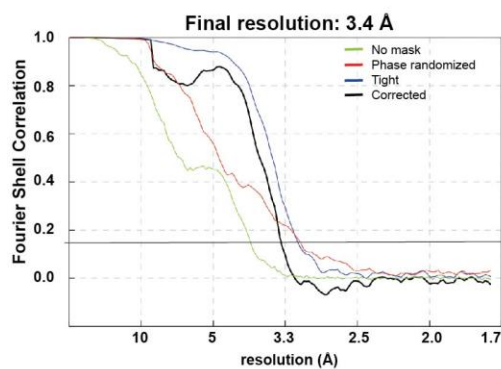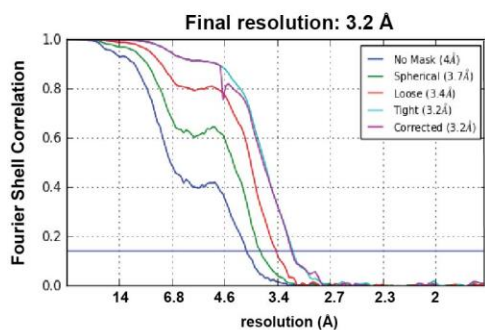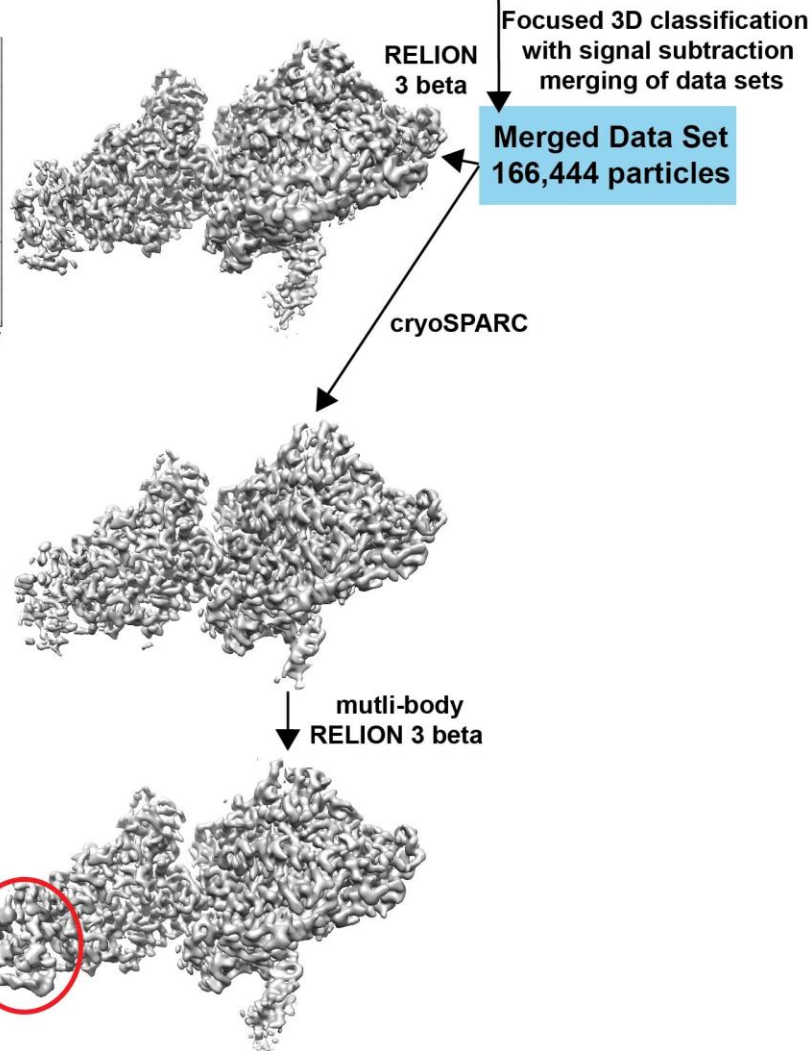

## Supplementary Figure 1

### Cryo-EM structure of DNA bound Pol $\delta$ holoenzyme.

Particles from three different data sets were merged and 3D refinement was performed with both cryoSPARC and RELION 3.0 beta to yield consensus maps at nominal resolution of 3.2 and 3.4 Å respectively. Consensus map from RELION was subjected to multi-body refinement, resulting in major improvement in density for Pol32N (circled in red) and regions of Pol31 that are furthest from the catalytic module.

**a Comparison of Pol $\delta$  regulatory module with homologs**

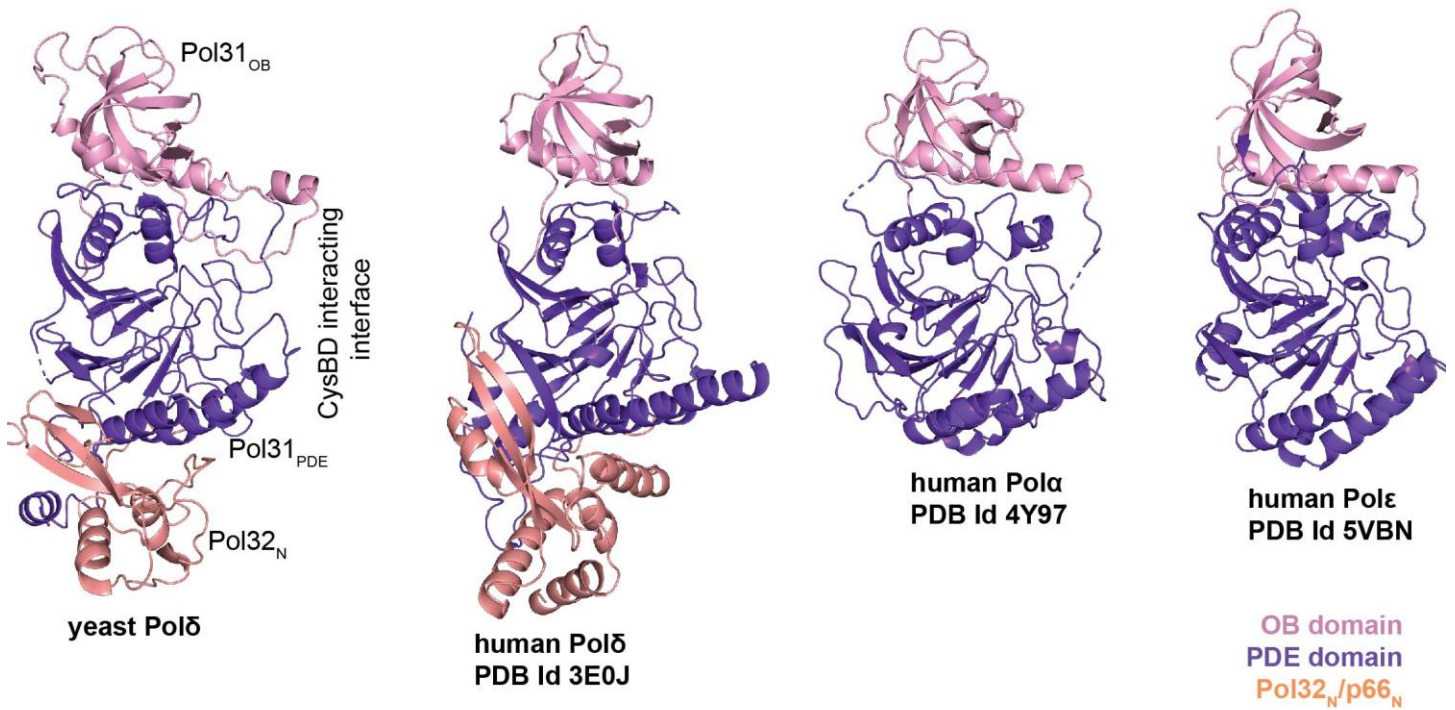

**b Comparison of Pol $\delta$  CysBD with homologs**

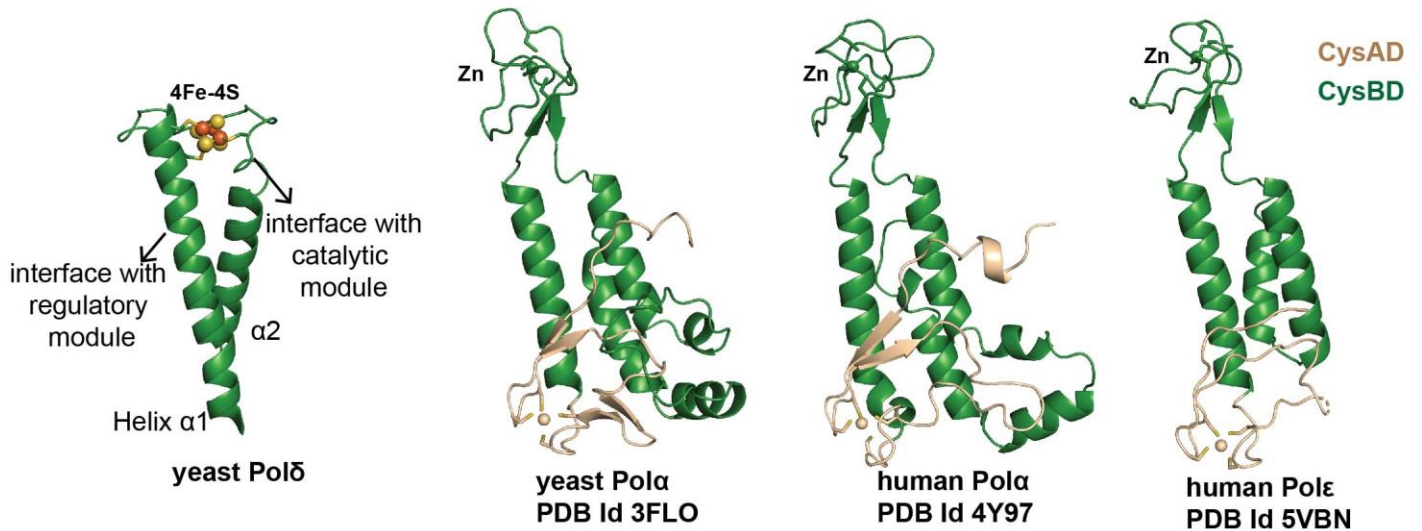

**Supplementary Figure 2**

**Comparison of Pol $\delta$  regulatory module and CysBD with those in homologs.**

**a:** The CysBD interacting interface of the regulatory module is substantially different between yeast Pol $\delta$ , human Pol $\delta$ , human Pol $\alpha$ , and human Pol $\epsilon$ . **b:** CysBD of yeast Pol $\delta$  is much smaller in size than the counterparts from pols  $\alpha$  and  $\epsilon$ . CysAD is disordered in yeast Pol $\delta$ .

## Model of yeast Pol $\delta$ -PCNA

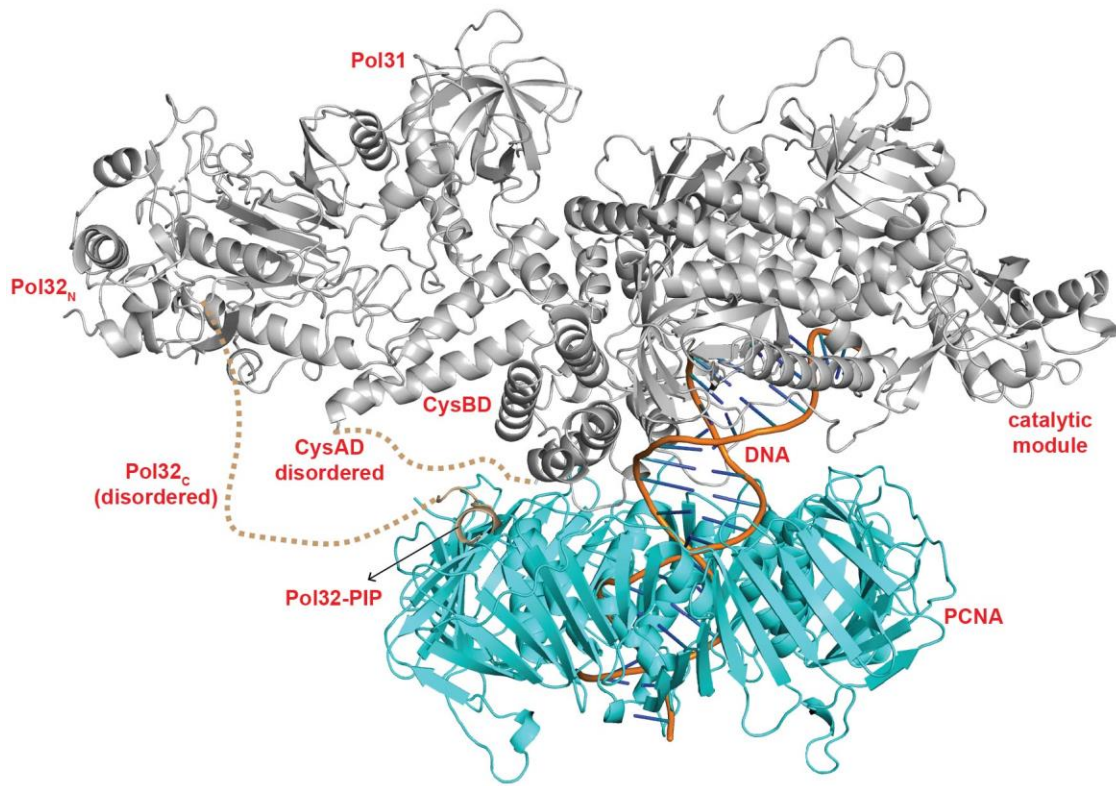

### Supplementary Figure 3

#### Model of Pol $\delta$ -PCNA complex.

Model of yeast Pol $\delta$  (this work) and PCNA (PDB Id. 2OD8) derived by threading the Pol $\delta$  bound DNA through the central hole of the PCNA.

**a CysBD mediated compaction of the module**

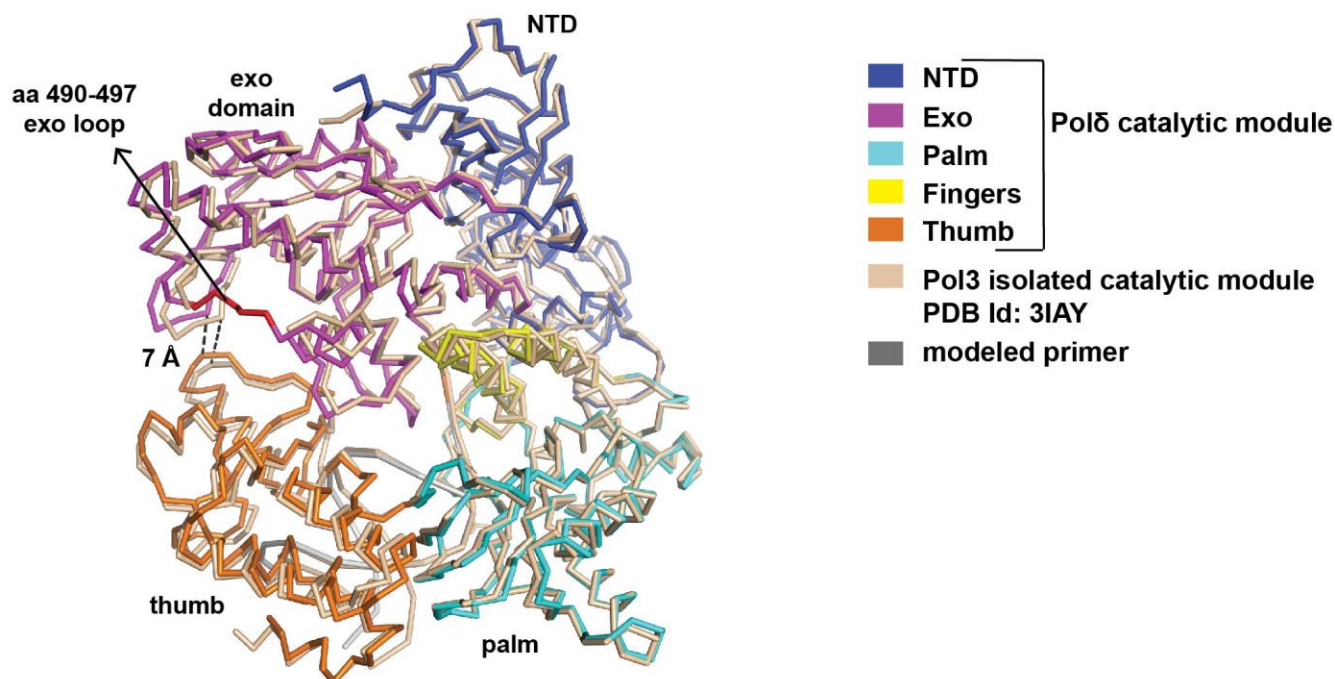

**b Interactions of exo loop with primer modeled at the exo site**

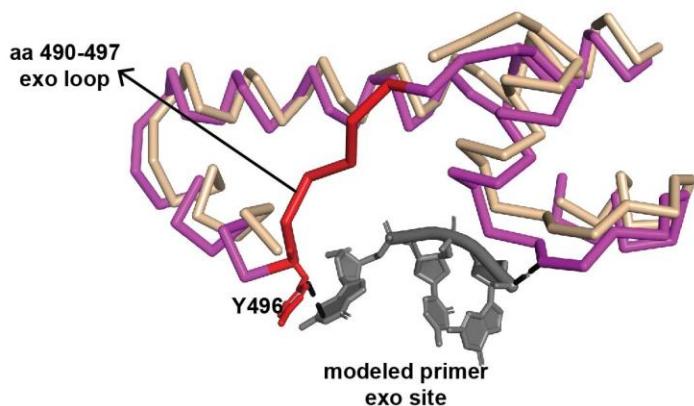

**Supplementary Figure 4**

**CysBD mediated changes in the Pol3 catalytic module.**

**a:** CysBD draws the exo and thumb domains of the catalytic module closer than their positions in the structure of the isolated catalytic module (3IAY) and results in an overall compaction of the catalytic module by > 2.5 Å **b:** A primer modeled at the exo active side is within van der Waals distance from Tyr996 which is part of the exo domain loop encompassing amino acids 490-497 that interacts with CysBD. This loop is disordered in the structure of the isolated catalytic module (3IAY).

**a Comparison of Pol $\delta$  consensus (left) and multi-body (right) maps**

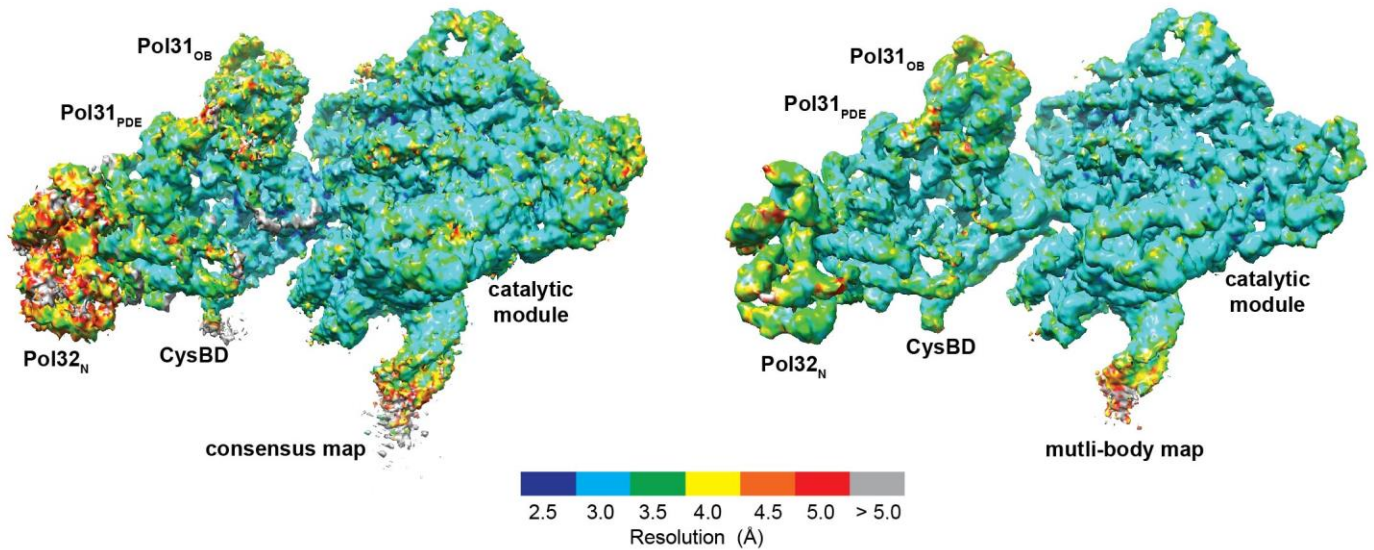

**b eigenvectors vs. variance**

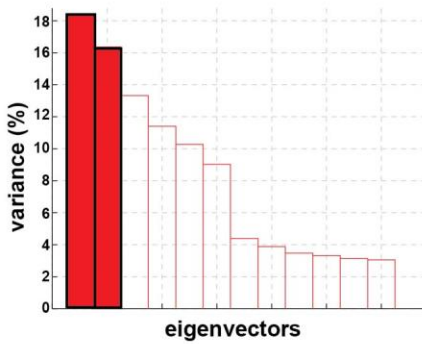

**c Histograms of amplitudes along the first (left) and second (right) eigenvectors**

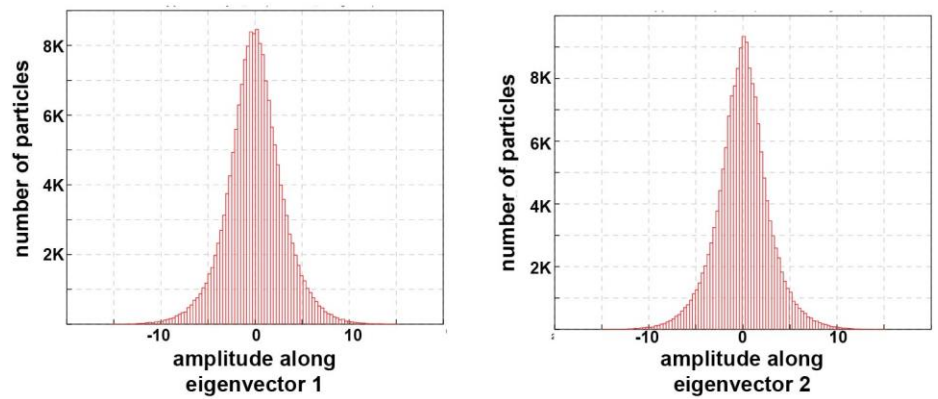

**Supplementary Figure 5**

**Multi-body refinement and principal component analysis of the relative orientations of the catalytic and regulatory modules.**

**a:** Consensus and multi-body maps colored by local resolution. Multi-body analysis results in a substantial improvement in resolution for regions of Pol31 and Pol32 that are farthest from the catalytic module, e.g. Pol32<sub>N</sub> and the OB fold of Pol31. **b:** Contribution of all eigenvectors to the variance. **c:** Histograms of amplitudes along the first two eigenvectors. Both histograms are unimodal, indicating continuous motion.

### Trajectories from Normal Mode Analysis

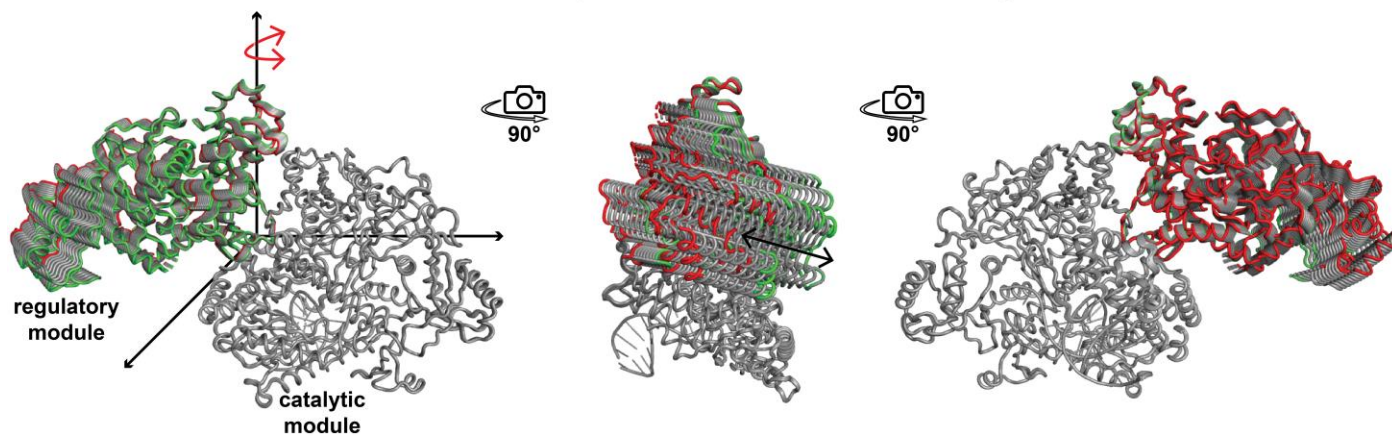

### Motion represented by eigenvector 1

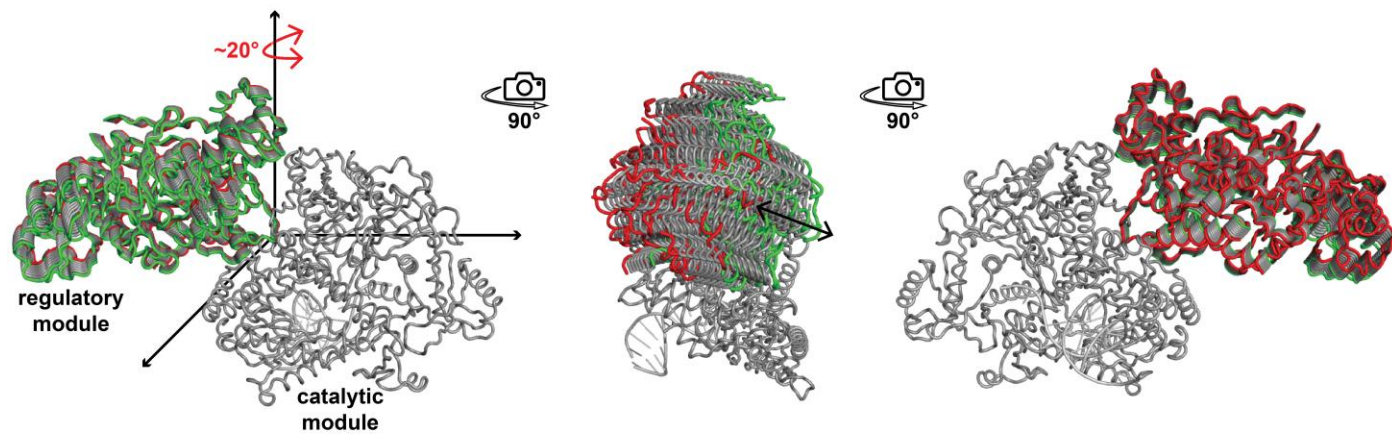

### Motion represented by eigenvector 2

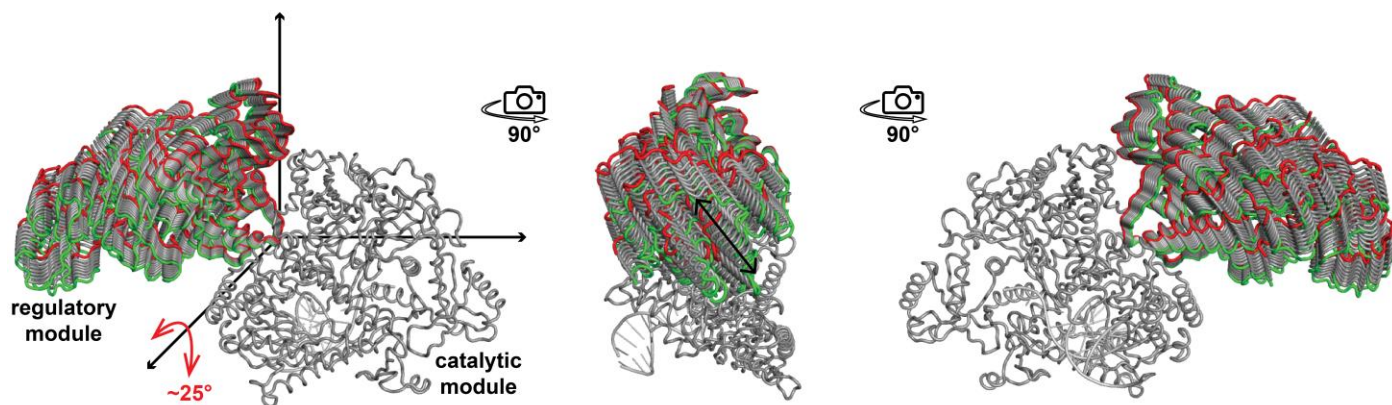

Supplementary Figure 6

Trajectories from normal mode analysis compared to motion from multi-body analysis.



End of range conformations for the regulatory module are shown in green and red. The first eigenvector from principal component analysis of multi-body refinement represents rocking motion of the regulatory module parallel to the catalytic module (middle), while the second eigenvector represents rocking motion towards the catalytic module (bottom). Trajectories for the first non-trivial mode of molecular motion from Normal Mode Analysis (top) corresponds to the motion represented by the first eigenvector (middle).

## Disease mutations

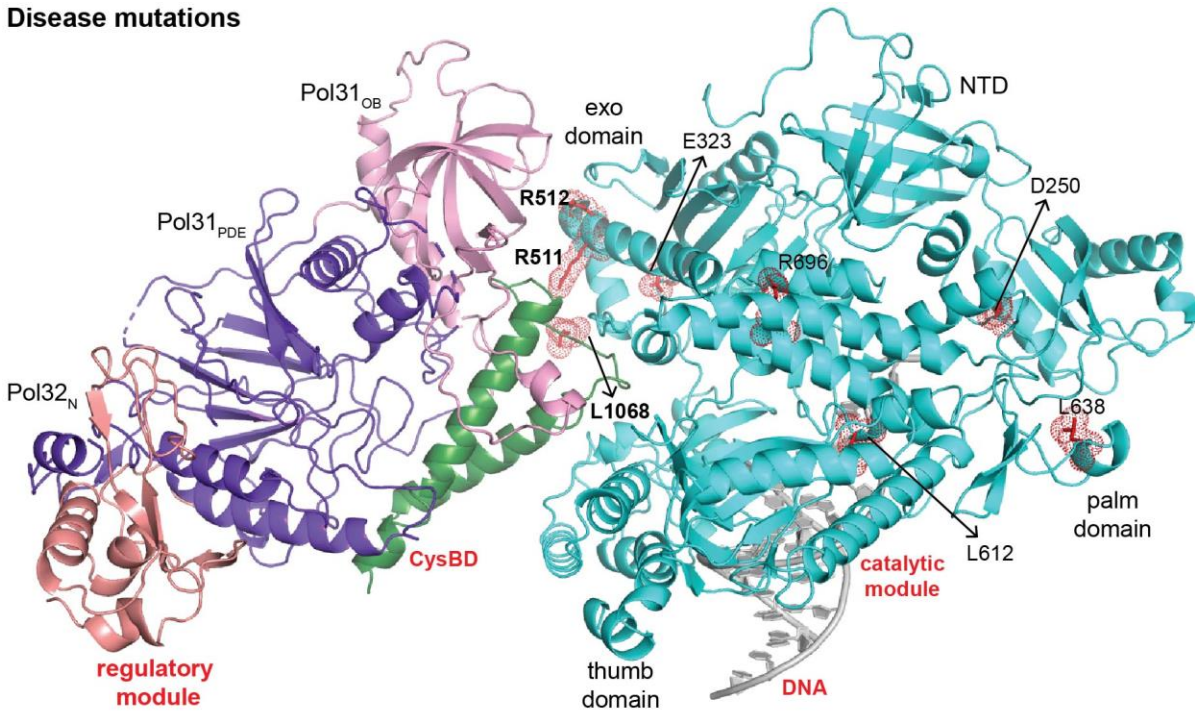

|   | human mutation | yeast equivalent | domain                   | disease       | status                |
|---|----------------|------------------|--------------------------|---------------|-----------------------|
| 1 | E245K          | D250             | NTD                      | cancer        | driver                |
| 2 | E318K          | E323             | exo                      | cancer        | driver                |
| 3 | L606M          | L612             | palm                     | cancer        | driver                |
| 4 | L632M          | L638             | palm                     | cancer        | driver                |
| 5 | R689W          | R696             | fingers                  | cancer        | driver                |
| 6 | R1016H         | K1013            | CysAD                    | cancer        | driver                |
| 7 | <b>R506H</b>   | <b>R511</b>      | <b>Exo / Interface</b>   | <b>cancer</b> | <b>unknown status</b> |
| 8 | <b>R507C</b>   | <b>R512</b>      | <b>Exo / Interface</b>   | <b>MDPL</b>   |                       |
| 9 | <b>I1070N</b>  | <b>L1068</b>     | <b>CysBD / Interface</b> | <b>MDPL</b>   |                       |

## Supplementary Figure 7

### Disease mutations in human Polδ.

Cancer driver mutations in human Polδ mapped on the structure of yeast Polδ (top). These mutations are distributed on the NTD, exo, palm, fingers and CysAD domains. The oncogenic R506H (exo) mutation and the MDPL associated R507C (exo) and I1070N (CysBD) mutations map to the interface between the catalytic and regulatory modules.
